# Supplementary material for: The Transcriptional Foundations of Sp110-mediated Macrophage (RAW264.7) Resistance to Mycobacterium tuberculosis H37Ra
Source: PubMed Central journal article supplement (PMC4766572; doi:10.1038/srep22041), 2016-02-25
Supplement: srep22041-s1.pdf [file srep22041-s1.pdf]

# The Transcriptional Foundations of Sp110-mediated Macrophage (RAW264.7) Resistance to *Mycobacterium tuberculosis* H37Ra

Yongyan Wu<sup>1,2</sup>, Zekun Guo<sup>1,2</sup>, Kezhen Yao<sup>1,2</sup>, Yue Miao<sup>1,3</sup>, Shuxin Liang<sup>1,2</sup>, Fayang Liu<sup>1,2</sup>, Yongsheng Wang<sup>1,2</sup>, and Yong Zhang<sup>1,2,\*</sup>

1 College of Veterinary Medicine, Northwest A&F University, Yangling 712100, Shaanxi, China

2 Key Laboratory of Animal Biotechnology, Ministry of Agriculture, Northwest A&F University, Yangling 712100, Shaanxi, China

3 Innovative Experimental College, Northwest A&F University, Yangling 712100, Shaanxi, China

\* Corresponding author: Yong Zhang ([zhylab@hotmail.com](mailto:zhylab@hotmail.com)), Tel: 86-2987080085

Supplementary Figure 1. Full-length blots of Figure 1 (b) in the main text.

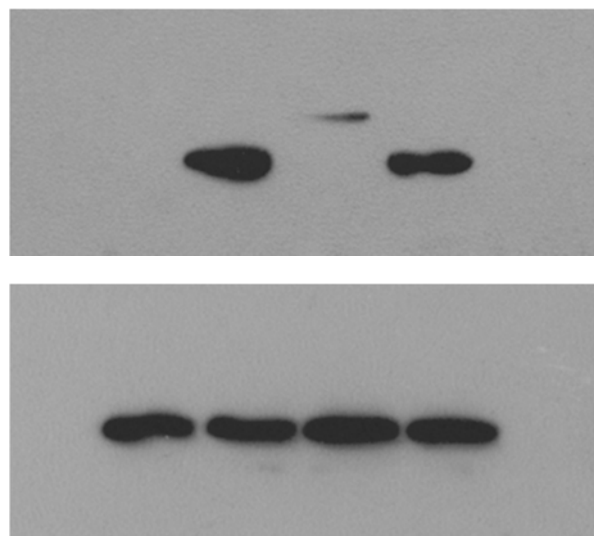

Supplementary Figure 2. Full-length blots of Figure 6 (a), (d), (e) and (f) in the main text.

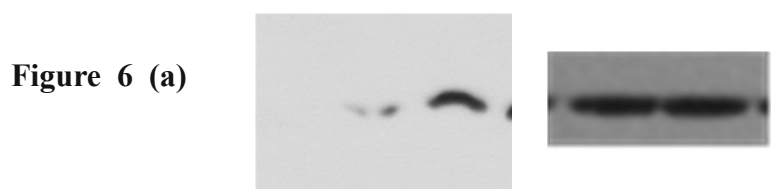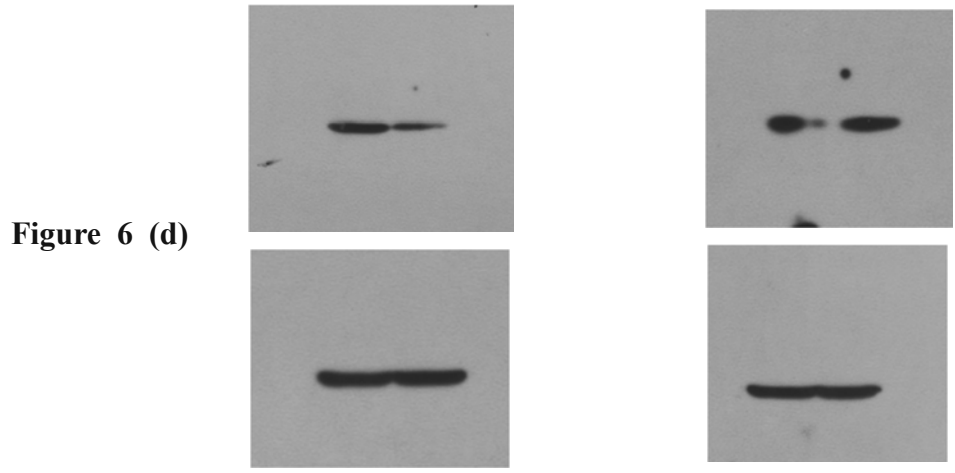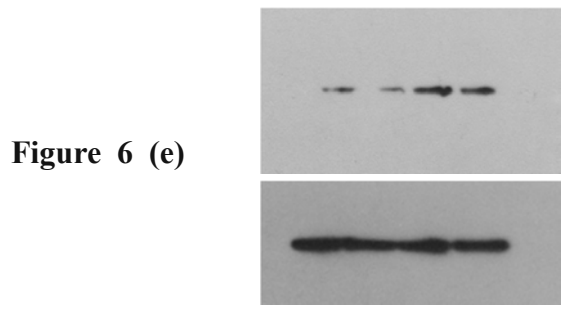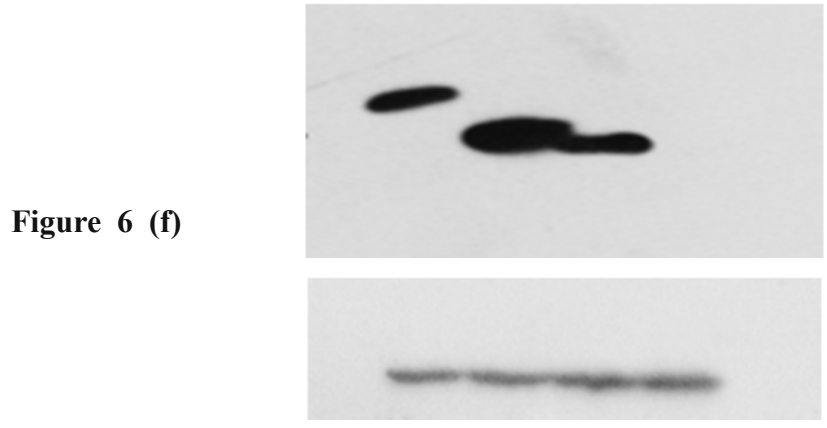

Supplementary Table 10. **Primer sequences for qPCR analysis.**

| <b>Gene name</b> | <b>Forward primer (5'- 3')</b> | <b>Reverse primer (5'-3')</b>                                                                                        |
|------------------|--------------------------------|----------------------------------------------------------------------------------------------------------------------|
| Bmf              | GGAGCGGGCGTATTTTGGAA           | ACACTCGATTGGGAAGAAGGG                                                                                                |
| Dock1            | AGTACGGCGTGGCCTTTTAC           | GACGGTTTCATGTTGCCCTTT                                                                                                |
| Il10             | GCTCTTACTGACTGGCATGAG          | CGCAGCTCTAGGAGCATGTG                                                                                                 |
| Ccl2             | TTAAAAACCTGGATCGGAACCAA        | GCATTAGCTTCAGATTTACGGGT                                                                                              |
| Aatk             | GGGAGGTATGAGTGTGGTGG           | TAGATCCCCATTCGTGGTGTG                                                                                                |
| Adrbk1           | GCGCCAGCAAGAAGATCCT            | GCAGAAGTCCCGGAAAAGCA                                                                                                 |
| Atp1a3           | TCTCAGATGTGTCCGTTCTTCT         | TGGAAAGAGAGTGAAAGGCAAG                                                                                               |
| Dusp14           | TTGCTCAGATCACCTCCTCTC          | AGTACAGTCTAATGGGGGCAT                                                                                                |
| Chek1            | GTTAAGCCACGAGAATGTAGTGA        | GATACTGGATATGGCCTTCCCT                                                                                               |
| Csf3             | ATGGCTCAACTTTCTGCCAG           | CTGACAGTGACCAGGGGAAC                                                                                                 |
| Cxcl2            | CCAACCACCAGGCTACAGG            | GCGTCACACTCAAGCTCTG                                                                                                  |
| Irak3            | AGGCCAAGTTAAGACCCACG           | ACCTCAGACTGGCTGCATTC                                                                                                 |
| Pdcd4            | CGAGGGGATCCTCAAGGAAGA          | TTTCCGCAGTCGTCTTTTGG                                                                                                 |
| Pdcd1            | TCATGAGTGCCCTAGTGGGT           | AGGGAGCTCTGGTGTCTTCT                                                                                                 |
| Cend2            | AGTCCCAGACTCCTAAGACCC          | GAAGTCGTGAGGGGTGACTG                                                                                                 |
| Pmp22            | CATCGCGGTGCTAGTGTTG            | AAGGCGGATGTGGTACAGTTC                                                                                                |
| Ccl4             | TTCCTGCTGTTTCTCTTACACCT        | CTGTCTGCCTCTTTTGGTCAG                                                                                                |
| Il6              | GCCTTCTTGGGACTGATGCT           | TGCCATTGCACAACCTTTTTCT                                                                                               |
| Tnf              | CCCTCACACTCACAACCAC            | ATAGCAAATCGGCTGACGGT                                                                                                 |
| Nos2             | GGTGAAGGGACTGAGCTGTT           | ACGTTCTCCGTTCTCTTGCAG                                                                                                |
| Casp2            | CACAGACTCCTGCGTAGTGG           | TGTCTCATCTCCACGACATGC                                                                                                |
| Casp3            | GAGCTTGAACGGTACGCTA            | GCGAGATGACATTCCAGTGC                                                                                                 |
| Casp6            | GAGGTGTCGACTTCAAGCCA           | CCGACAGGCCTGGATGATAA                                                                                                 |
| Casp7            | CCTCTGGGACTTTTGCTTTCA          | CTGATCATCGGTCATCGTTCC                                                                                                |
| Casp8            | CGGAGGCATTTCTGTCCCCTA          | AGAGCTGTAACCTGTGGCCG                                                                                                 |
| Casp9            | ACCTTCCCAGGTTGCCAATG           | AGCCTGCCCCAGTTCAAAT                                                                                                  |
| Gapdh            | GTGTTCTACCCCAATGTGT            | ATTGTCATACCAGGAAATGAGCTT                                                                                             |
| miR-125a         | TCCCTGAGACCCTTTAACC            | The reverse primer for qPCR experiments of miRNAs is a universal primer provided by the miScript II RT Kit (QIAGEN). |
| miR-21a          | GGGTAGCTTATCAGACTGATGTTGA      |                                                                                                                      |
| miR-27b          | AGAGCTTAGCTGATTGGTGAAC         |                                                                                                                      |
| miR-29a          | ACTGATTTCTTTTGGTGTTCAG         |                                                                                                                      |

|          |                         |  |
|----------|-------------------------|--|
| miR-146a | GGTGAGAACTGAATTCCATG    |  |
| miR-155  | TTAATGCTAATTGTGATAGGGGT |  |
| miR-99b  | CACCCGTAGAACCGACCTTGC   |  |
| Rnu6     | TGCGCAAGGATGACACGC      |  |
